# Supplementary material for: Freestanding electrodes with polyaniline/Au derived from electrospun carbon nanofibers for high-performance supercapacitors
Source: Royal Society of Chemistry journal article supplement (doi:10.1039/d4ce00625a), 2024-01-01
Supplement: d4ce00625a1.pdf [file d4ce00625a1.pdf]

## *Supporting Information*

### **Freestanding Electrodes with Polyaniline/Au Derived from Electrospun Carbon Nanofibers for High-Performance Supercapacitors**

Yan Bu, Yunwei Zou, Ruibai Cang, Xuejiao Zhou\*, Peng Yu and Mingyi Zhang\*

*Key Laboratory for Photonic and Electronic Bandgap Materials, Ministry of Education,  
School of Physics and Electronic Engineering, Harbin Normal University, Harbin  
150025, People's Republic of China*

#### **Corresponding Authors**

*\*E-mail: [zhouxj@hrbnu.edu.cn](mailto:zhouxj@hrbnu.edu.cn) (X. J. Zhou)*

*\*E-mail: [zhangmingyi@hrbnu.edu.cn](mailto:zhangmingyi@hrbnu.edu.cn) (M. Y. Zhang)*

*Tel: +86 45188060349*

**Figure Captions:**

**Fig. S1** Histograms of diameter of the (a) CNFs, (b) CNFs/PANI, (c) CNFs/PANI/Au, and (d) CNFs/Au nanofibers.

**Fig. S2** (a) SEM images of slurry-coating CNFs/PANI/Au electrode after GCD test and (b) GCD curves at different current densities in the 1 M H<sub>2</sub>SO<sub>4</sub> electrolyte.

**Fig. S3** CV curves of the (a) CNFs, (c) CNFs/PANI, and (e) CNFs/Au nanofiber electrodes at different scan rates in the 1 M H<sub>2</sub>SO<sub>4</sub> electrolyte; GCD curves of the (b) CNFs, (d) CNFs/PANI, and (f) CNFs/Au at different current densities in the 1 M H<sub>2</sub>SO<sub>4</sub> electrolyte.

**Fig. S4** SEM images of CNFs/PANI/Au electrode after 5000 cycles.

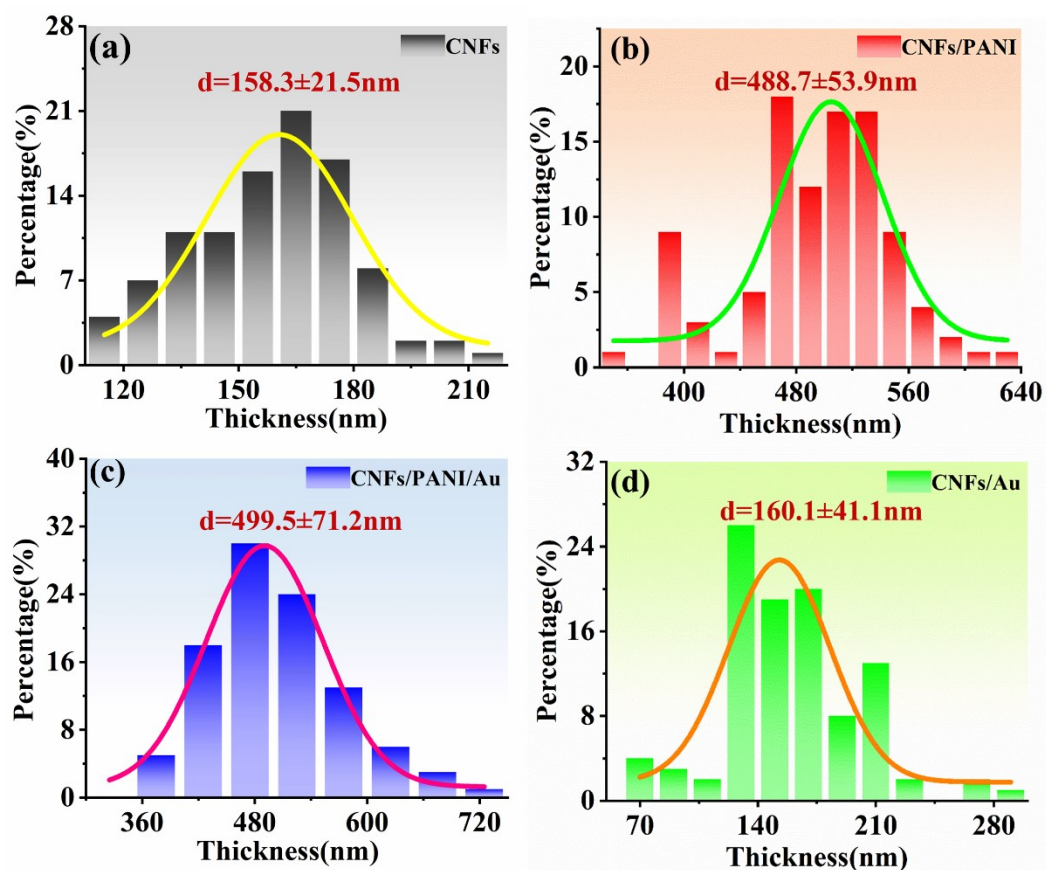

**Fig. S1** Histograms of diameter of the (a) CNFs, (b) CNFs/PANI, (c) CNFs/PANI/Au, and (d) CNFs/Au nanofibers.

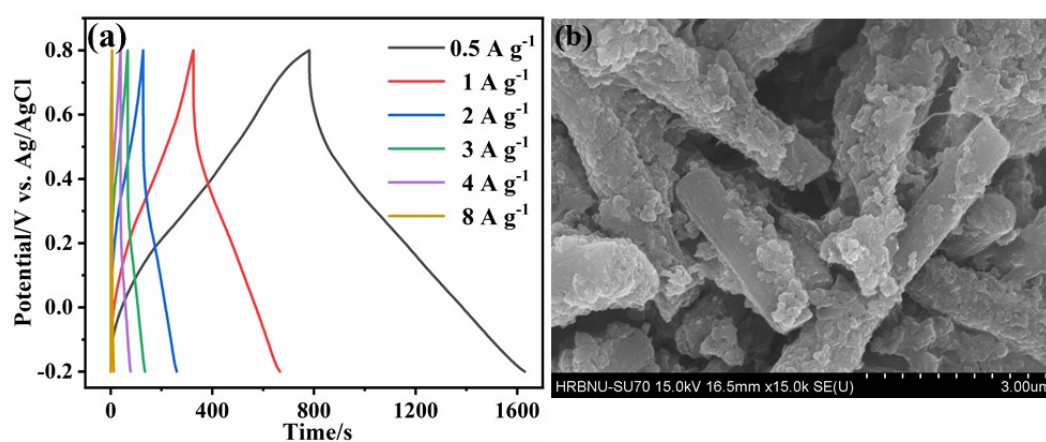

**Fig. S2** (a) SEM images of slurry-coating CNFs/PANI/Au electrode after GCD test and (b) GCD curves at different current densities in the 1 M H<sub>2</sub>SO<sub>4</sub> electrolyte.

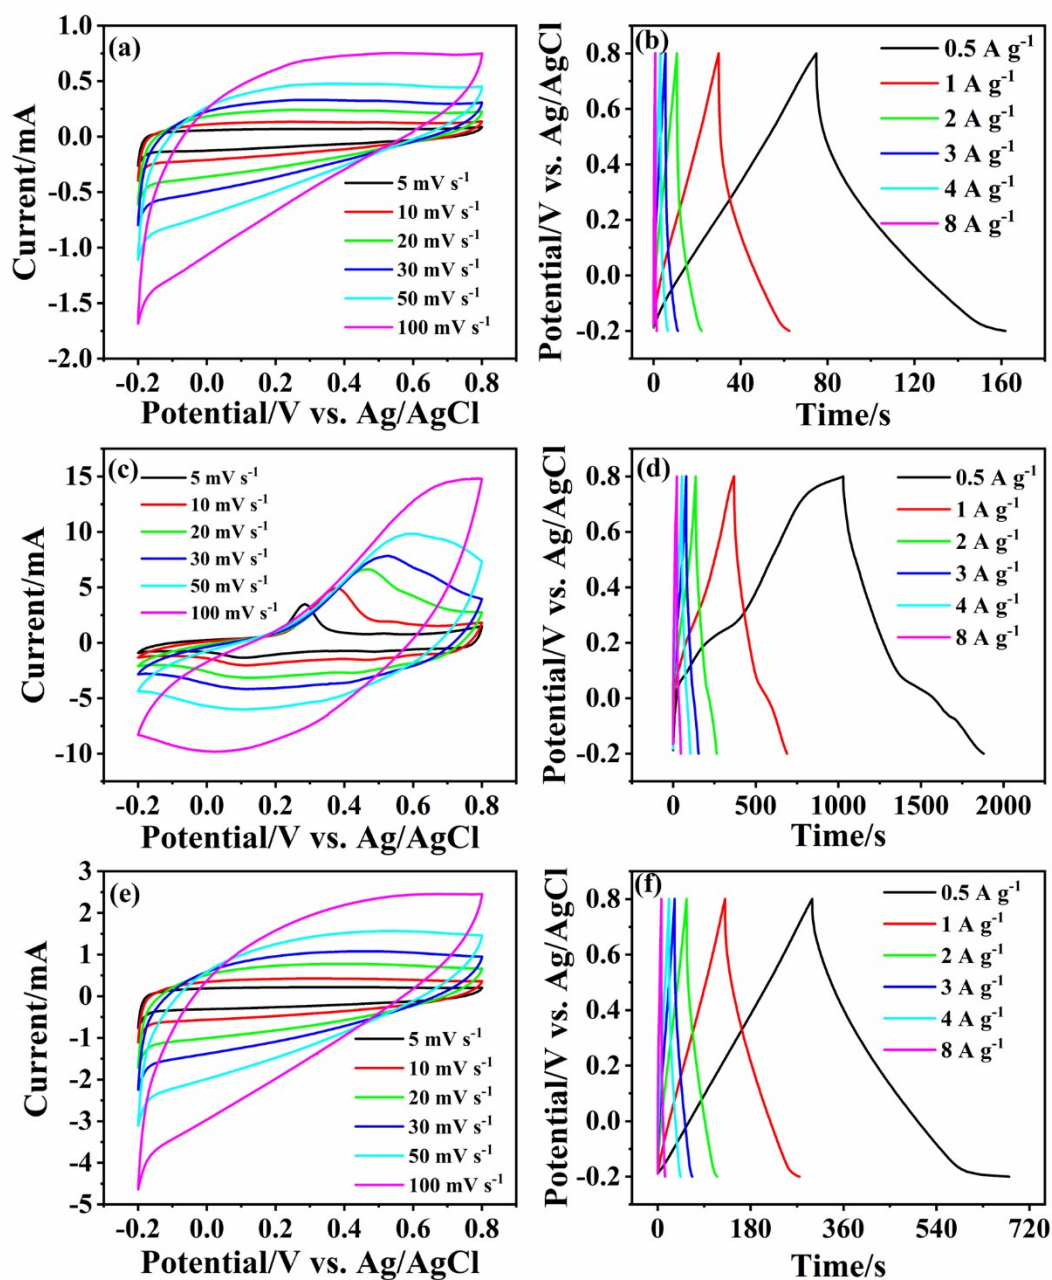

**Fig. S3** CV curves of the (a) CNFs, (c) CNFs/PANI, and (e) CNFs/Au nanofiber electrodes at different scan rates in the 1 M H<sub>2</sub>SO<sub>4</sub> electrolyte; GCD curves of the (b) CNFs, (d) CNFs/PANI, and (f) CNFs/Au at different current densities in the 1 M H<sub>2</sub>SO<sub>4</sub> electrolyte.

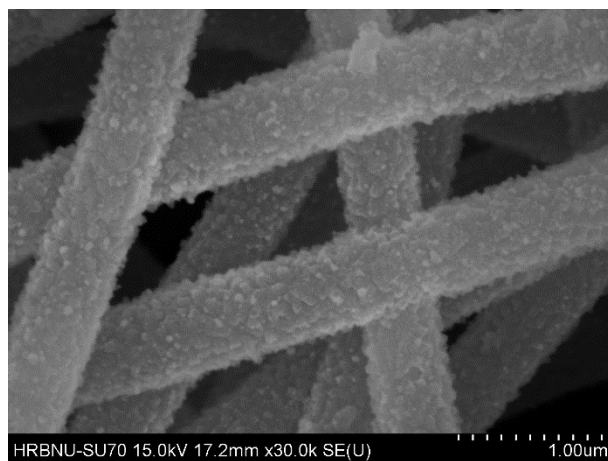

**Fig. S4** SEM images of CNFs/PANI/Au electrode after 5000 cycles.
